# Supplementary material
Source: PubMed Central journal article supplement (PMC1110741)
Supplement: nar_33_8_2685__1.pdf [file nar_33_8_2685__1.pdf]

## SUPPLEMENTARY MATERIAL

**Fig. S1:** see below

**Table SI:** *see below*

**Table SII:** see below

### **EXCEL file: 'supplement.XLS'**

The file comprises 11 data sheets. Genes are listed according to the AGI codes.

**Sheet 1 '301 genes':** Statistical data for 301 genes showing transcript co-responses with the *BRI1* and *BAK1* genes. 44 genes subjected to RT-PCR analysis are highlighted.

**Sheet 2 'Spearman rs', sheet 3 'pvalue', and sheet 4 'power':** Bootstrap analysis results for 135 functionally classified genes. 44 genes subjected to RT-PCR analysis are highlighted.

**Sheet 5 'complete Affx results':** Expression analysis of 301 genes in expression profiles of BL-, EBL-, CS-, BRZ-, GA- and PAC-treated plants. Numbers give signal log ratios. Genes which were BR-induced / BR-repressed in at least two situations are highlighted in red / green. Genes subjected to RT-PCR analysis, and the *BRI1* and *BAK1* genes are in bold type. Detection p-values, signal log ratios, and change p-values were used to filter out significant changes in transcript levels (see text). Non-significant changes were left out in order to aid legibility.

**Sheet 6 'Affx results BRs, BRZ':** Expression analysis of 301 genes in expression profiles of BL- EBL-, CS-, and BRZ-treated.

**Sheet 7 'Affx results GA3, PAC':** Expression analysis of 301 genes in expression profiles of GA3- and PAC-treated plants.

**Sheet 8 'nasc0271':** Recovery of known BR-responsive genes in the nasc0271 database. BR-signalling genes, BR-biosynthesis genes, and known BR-responsive genes were used for transcript co-response analysis. Data were filtered for significant co-responses. Numbers give Spearman's correlation coefficients.

**Sheet 9 'nasc0272':** Recovery of known BR-responsive genes in the nasc0272 database.

**Sheet 10 'nasc0273':** Recovery of known BR-responsive genes in the nasc0273 database.

**Sheet 11 'nasc profiles':** Three data matrices were established using 123 expression profiles. The table specifies the experiments and profiles underlying the nasc0271, nasc0272, and nasc0273 matrices.

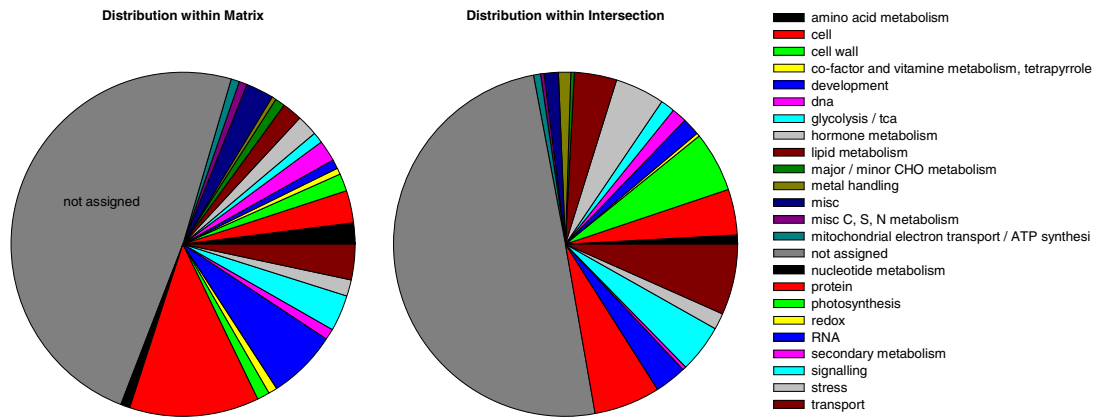

**Figure S1.** Functional classification of 301 genes. Categories were deduced from the MapMan software (16) but slightly modified (Table S1).

**Table S1.** Modified bins for functional classification of genes. Assignments into bins were taken from the MapMan software (16). Bins were merged as indicated within this table.

| <b>MapManBin</b>                                 | <b>JointBin</b>                                           |
|--------------------------------------------------|-----------------------------------------------------------|
| fermentation                                     | misc C, S, N metabolism                                   |
| gluconeogenesis/ glyoxylate cycle                | misc C, S, N metabolism                                   |
| biodegradation of xenobiotics                    | misc C, S, N metabolism                                   |
| S-assimilation                                   | misc C, S, N metabolism                                   |
| polyamine metabolism                             | misc C, S, N metabolism                                   |
| N-metabolism                                     | misc C, S, N metabolism                                   |
| C1-metabolism                                    | misc C, S, N metabolism                                   |
| OPP                                              | misc C, S, N metabolism                                   |
| control genes                                    | control genes                                             |
| tetrapyrrole synthesis                           | Co-factor and vitamine metabolism, tetrapyrrole synthesis |
| Co-factor and vitamine metabolism                | Co-factor and vitamine metabolism, tetrapyrrole synthesis |
| glycolysis                                       | glycolysis / TCA                                          |
| TCA / org                                        | glycolysis / TCA                                          |
| minor CHO metabolism                             | major / minor CHO metabolism                              |
| major CHO metabolism                             | major / minor CHO metabolism                              |
| metal handling                                   | metal handling                                            |
| mitochondrial electron transport / ATP synthesis | mitochondrial electron transport / ATP synthesis          |
| redox                                            | redox                                                     |
| nucleotide metabolism                            | nucleotide metabolism                                     |
| PS                                               | PS                                                        |
| secondary metabolism                             | secondary metabolism                                      |
| development                                      | development                                               |
| amino acid metabolism                            | amino acid metabolism                                     |
| lipid metabolism                                 | lipid metabolism                                          |
| cell wall                                        | cell wall                                                 |
| cell                                             | cell                                                      |
| stress                                           | stress                                                    |
| transport                                        | transport                                                 |
| hormone metabolism                               | hormone metabolism                                        |
| DNA                                              | DNA                                                       |
| misc                                             | misc                                                      |
| signalling                                       | signalling                                                |
| RNA                                              | RNA                                                       |
| protein                                          | protein                                                   |
| not assigned                                     | not assigned                                              |

**Table SII.** RT-PCR analysis of 44 cell wall and growth-related genes in 12 situations used for the calculation of fold change values in Tables V and VI.  $C_T$  values were calculated from 3 technical replicates per experiment.  $C_T$  values of the *eIF1 $\alpha$*  control gene were subtracted from  $C_T$  values of the genes of interest to account for different cDNA amounts. The resulting  $nC_T$  values were subtracted from an arbitrary value (i.e. 30). Numbers give the difference ( $30 - nC_T$ ) and the standard error (SE) of  $C_T$  values for each gene of interest. Higher numbers indicate stronger expression.

| Gene           |           | sterile culture |             |             | sterile culture |                |            | sterile culture |                |               | soil       |               |              |
|----------------|-----------|-----------------|-------------|-------------|-----------------|----------------|------------|-----------------|----------------|---------------|------------|---------------|--------------|
|                |           | WT              | <i>cbb2</i> | <i>cbb3</i> | WT              | WT             | WT         | <i>dwf1-6</i>   | <i>dwf1-6</i>  | <i>dwf1-6</i> | WT         | <i>dwf1-6</i> | $\alpha$ CPD |
|                |           | 19d             | 19d         | 19d         | 14d             | control<br>14d | BR<br>14d  | 14d             | control<br>14d | BR<br>14d     | 28d        | 28d           | 28d          |
| <i>KCS1</i>    | At1g01120 | 8.8 ± 0.0       | 8.1 ± 0.0   | 7.5 ± 0.0   | 9.4 ± 0.0       | 9.0 ± 0.0      | 9.7 ± 0.0  | 8.5 ± 0.0       | 8.8 ± 0.0      | 9.4 ± 0.0     | 8.6 ± 0.0  | 6.7 ± 0.0     | 7.8 ± 0.0    |
| <i>PIP1.3</i>  | At1g01620 | 7.2 ± 0.0       | 6.6 ± 0.0   | 6.2 ± 0.0   | 8.3 ± 0.0       | 7.9 ± 0.0      | 7.8 ± 0.0  | 6.3 ± 0.1       | 6.5 ± 0.0      | 7.2 ± 0.0     | 7.3 ± 0.0  | 7.5 ± 0.0     | 7.8 ± 0.0    |
| <i>FLA9</i>    | At1g03870 | 6.1 ± 0.0       | 6.0 ± 0.0   | 6.5 ± 0.0   | 6.2 ± 0.0       | 5.9 ± 0.1      | 6.6 ± 0.1  | 5.5 ± 0.0       | 5.9 ± 0.0      | 6.5 ± 0.1     | 6.3 ± 0.0  | 6.1 ± 0.1     | 6.3 ± 0.0    |
|                | At1g27600 | 7.0 ± 0.0       | 7.2 ± 0.0   | 6.3 ± 0.0   | 6.3 ± 0.0       | 6.3 ± 0.0      | 7.6 ± 0.0  | 5.2 ± 0.0       | 5.4 ± 0.0      | 5.9 ± 0.0     | 6.2 ± 0.0  | 5.7 ± 0.0     | 5.1 ± 0.0    |
|                | At1g31310 | 3.2 ± 0.0       | 4.3 ± 0.0   | 4.0 ± 0.0   | 3.5 ± 0.0       | 3.7 ± 0.1      | 4.7 ± 0.0  | 3.7 ± 0.0       | 3.5 ± 0.1      | 3.7 ± 0.0     | 3.8 ± 0.1  | 4.7 ± 0.0     | 3.7 ± 0.0    |
| <i>AGP21</i>   | At1g55330 | 10.3 ± 0.0      | 8.3 ± 0.0   | 8.1 ± 0.0   | 11.0 ± 0.0      | 11.1 ± 0.0     | 11.2 ± 0.0 | 9.8 ± 0.0       | 10.2 ± 0.1     | 11.0 ± 0.0    | 10.5 ± 0.0 | 10.2 ± 0.0    | 9.2 ± 0.0    |
| <i>CYCD1.1</i> | At1g70210 | 4.5 ± 0.1       | 4.9 ± 0.1   | 4.2 ± 0.0   | 4.8 ± 0.0       | 4.9 ± 0.0      | 3.5 ± 0.0  | 3.4 ± 0.0       | 3.2 ± 0.0      | 2.8 ± 0.0     | 4.4 ± 0.0  | 4.5 ± 0.0     | 4.4 ± 0.0    |
| <i>EXT</i>     | At2g06850 | 6.8 ± 0.0       | 6.4 ± 0.0   | 5.7 ± 0.0   | 8.4 ± 0.0       | 8.1 ± 0.0      | 8.3 ± 0.0  | 7.0 ± 0.0       | 7.4 ± 0.0      | 7.7 ± 0.0     | 7.6 ± 0.0  | 7.6 ± 0.0     | 8.0 ± 0.0    |
| <i>AGP9</i>    | At2g14890 | 10.2 ± 0.1      | 9.2 ± 0.0   | 9.4 ± 0.0   | 11.3 ± 0.4      | 10.8 ± 0.0     | 10.4 ± 0.0 | 10.4 ± 0.0      | 10.1 ± 0.0     | 10.1 ± 0.0    | 10.4 ± 0.0 | 10.2 ± 0.0    | 9.3 ± 0.0    |
| <i>PIP2.8</i>  | At2g16850 | 5.7 ± 0.0       | 4.3 ± 0.0   | 3.6 ± 0.0   | 5.6 ± 0.0       | 5.8 ± 0.1      | 5.4 ± 0.1  | 3.6 ± 0.2       | 4.3 ± 0.1      | 5.0 ± 0.0     | 5.4 ± 0.0  | 5.8 ± 0.0     | 5.1 ± 0.0    |
| <i>GRL1</i>    | At2g22840 | 5.9 ± 0.0       | 5.7 ± 0.2   | 5.1 ± 0.1   | 5.2 ± 0.0       | 5.3 ± 0.0      | 4.2 ± 0.0  | 4.9 ± 0.0       | 4.7 ± 0.0      | 4.0 ± 0.0     | 5.6 ± 0.1  | 6.5 ± 0.0     | 6.6 ± 0.1    |
| <i>GRL3</i>    | At2g36400 | 5.0 ± 0.0       | 5.0 ± 0.0   | 4.6 ± 0.0   | 5.9 ± 0.0       | 6.0 ± 0.1      | 5.1 ± 0.0  | 5.5 ± 0.0       | 5.7 ± 0.0      | 4.9 ± 0.0     | 5.0 ± 0.0  | 6.3 ± 0.1     | 6.2 ± 0.0    |
| <i>TIP1.1</i>  | At2g36830 | 7.5 ± 0.0       | 6.7 ± 0.0   | 7.2 ± 0.1   | 7.7 ± 0.0       | 7.9 ± 0.0      | 7.3 ± 0.0  | 7.2 ± 0.1       | 7.1 ± 0.0      | 7.5 ± 0.0     | 8.0 ± 0.0  | 8.5 ± 0.0     | 7.7 ± 0.0    |
| <i>PIP1.2</i>  | At2g45960 | 9.5 ± 0.0       | 8.6 ± 0.1   | 8.6 ± 0.0   | 9.2 ± 0.0       | 9.2 ± 0.1      | 8.6 ± 0.0  | 8.2 ± 0.1       | 8.3 ± 0.0      | 8.3 ± 0.0     | 9.7 ± 0.1  | 9.0 ± 0.0     | 9.6 ± 0.0    |
|                | At3g05910 | 8.4 ± 0.0       | 8.1 ± 0.0   | 7.7 ± 0.0   | 8.8 ± 0.0       | 8.9 ± 0.1      | 8.9 ± 0.0  | 8.5 ± 0.0       | 8.2 ± 0.1      | 8.9 ± 0.0     | 8.8 ± 0.0  | 7.9 ± 0.0     | 8.2 ± 0.1    |
| <i>TIP2.1</i>  | At3g16240 | 7.9 ± 0.0       | 7.2 ± 0.0   | 6.6 ± 0.0   | 9.5 ± 0.0       | 9.1 ± 0.1      | 8.9 ± 0.1  | 7.9 ± 0.1       | 8.1 ± 0.3      | 8.5 ± 0.0     | 9.4 ± 0.0  | 9.8 ± 0.0     | 9.4 ± 0.0    |
|                | At3g24480 | 9.8 ± 0.0       | 9.0 ± 0.1   | 9.0 ± 0.0   | 9.5 ± 0.0       | 9.5 ± 0.1      | 11.0 ± 0.0 | 9.0 ± 0.0       | 9.1 ± 0.0      | 10.0 ± 0.1    | 9.2 ± 0.0  | 8.4 ± 0.0     | 8.8 ± 0.4    |
| <i>TIP1.2</i>  | At3g26520 | 10.9 ± 0.0      | 9.8 ± 0.2   | 10.1 ± 0.1  | 11.9 ± 0.0      | 12.3 ± 0.0     | 11.7 ± 0.0 | 11.2 ± 0.0      | 11.5 ± 0.0     | 11.2 ± 0.0    | 11.5 ± 0.0 | 11.0 ± 0.0    | 10.7 ± 0.0   |

|                |           |            |            |           |            |            |            |            |            |            |            |           |           |
|----------------|-----------|------------|------------|-----------|------------|------------|------------|------------|------------|------------|------------|-----------|-----------|
| <i>CSLC4</i>   | At3g28180 | 3.5 ± 0.0  | 3.8 ± 0.1  | 2.5 ± 0.0 | 3.8 ± 0.1  | 4.4 ± 0.0  | 5.0 ± 0.0  | 3.3 ± 0.1  | 2.9 ± 0.0  | 4.6 ± 0.1  | 5.2 ± 0.0  | 5.5 ± 0.0 | 5.1 ± 0.0 |
| <i>PIP2.1</i>  | At3g53420 | 7.7 ± 0.0  | 7.1 ± 0.0  | 6.7 ± 0.0 | 8.6 ± 0.0  | 8.3 ± 0.0  | 7.7 ± 0.0  | 7.1 ± 0.0  | 7.7 ± 0.0  | 6.8 ± 0.0  | 8.9 ± 0.1  | 8.1 ± 0.0 | 8.9 ± 0.0 |
|                | At3g57790 | 7.3 ± 0.0  | 6.7 ± 0.0  | 6.6 ± 0.0 | 7.1 ± 0.2  | 7.5 ± 0.3  | 8.6 ± 0.0  | 6.7 ± 0.2  | 4.4 ± 0.0  | 6.5 ± 0.1  | 7.9 ± 0.0  | 6.4 ± 0.0 | 7.0 ± 0.0 |
| <i>PIP1.1</i>  | At3g61430 | 9.6 ± 0.0  | 9.0 ± 0.0  | 8.8 ± 0.0 | 9.6 ± 0.0  | 9.4 ± 0.0  | 9.2 ± 0.0  | 8.1 ± 0.0  | 8.4 ± 0.0  | 8.4 ± 0.1  | 9.7 ± 0.0  | 9.0 ± 0.1 | 9.5 ± 0.0 |
|                | At4g02500 | 7.9 ± 0.0  | 8.0 ± 0.0  | 7.7 ± 0.2 | 7.9 ± 0.0  | 8.0 ± 0.0  | 7.7 ± 0.0  | 7.8 ± 0.0  | 8.3 ± 0.0  | 8.4 ± 0.0  | 8.5 ± 0.0  | 8.2 ± 0.1 | 8.7 ± 0.0 |
| <i>SKU5</i>    | At4g12420 | 9.7 ± 0.0  | 9.2 ± 0.0  | 8.5 ± 0.0 | 10.4 ± 0.0 | 10.3 ± 0.0 | 10.5 ± 0.0 | 9.9 ± 0.0  | 10.3 ± 0.0 | 10.4 ± 0.0 | 9.3 ± 0.0  | 9.6 ± 0.1 | 9.4 ± 0.0 |
| <i>FLA2</i>    | At4g12730 | 10.2 ± 0.0 | 8.8 ± 0.0  | 8.7 ± 0.0 | 10.7 ± 0.0 | 10.2 ± 0.0 | 10.4 ± 0.0 | 10.1 ± 0.0 | 10.6 ± 0.0 | 10.6 ± 0.0 | 10.0 ± 0.0 | 9.6 ± 0.0 | 9.2 ± 0.1 |
|                | At4g13340 | 6.0 ± 0.1  | 5.8 ± 0.0  | 4.2 ± 0.2 | 7.0 ± 0.0  | 7.0 ± 0.0  | 7.9 ± 0.0  | 6.2 ± 0.1  | 6.6 ± 0.1  | 7.7 ± 0.0  | 7.0 ± 0.0  | 7.4 ± 0.0 | 6.1 ± 0.0 |
|                | At4g14130 | 6.0 ± 0.0  | 7.5 ± 0.0  | 5.9 ± 0.0 | 6.3 ± 0.1  | 5.9 ± 0.0  | 8.1 ± 0.0  | 7.9 ± 0.0  | 8.9 ± 0.0  | 6.9 ± 0.0  | 5.2 ± 0.0  | 9.0 ± 0.0 | 6.0 ± 0.0 |
|                | At4g18670 | 4.1 ± 0.0  | 3.4 ± 0.0  | 2.8 ± 0.2 | 3.2 ± 0.0  | 3.6 ± 0.0  | 3.2 ± 0.0  | 3.0 ± 0.1  | 3.0 ± 0.0  | 3.0 ± 0.0  | 3.4 ± 0.0  | 3.5 ± 0.0 | 3.2 ± 0.0 |
| <i>PIP1.5</i>  | At4g19410 | 8.5 ± 0.0  | 8.7 ± 0.3  | 8.3 ± 0.0 | 7.7 ± 0.1  | 7.9 ± 0.1  | 9.5 ± 0.0  | 7.4 ± 0.1  | 7.7 ± 0.0  | 7.8 ± 0.0  | 9.4 ± 0.0  | 9.3 ± 0.0 | 8.6 ± 0.0 |
|                | At4g23400 | 8.9 ± 0.0  | 8.1 ± 0.0  | 8.3 ± 0.0 | 9.8 ± 0.0  | 9.5 ± 0.1  | 8.9 ± 0.0  | 8.8 ± 0.0  | 9.1 ± 0.0  | 8.1 ± 0.0  | 9.1 ± 0.0  | 9.7 ± 0.0 | 9.5 ± 0.0 |
|                | At4g25260 | 7.1 ± 0.0  | 6.1 ± 0.0  | 5.9 ± 0.2 | 8.0 ± 0.0  | 7.6 ± 0.0  | 7.1 ± 0.1  | 7.6 ± 0.0  | 7.2 ± 0.4  | 7.0 ± 0.1  | 7.0 ± 0.0  | 6.1 ± 0.1 | 7.1 ± 0.0 |
|                | At4g25620 | 7.3 ± 0.0  | 7.8 ± 0.0  | 7.2 ± 0.0 | 7.8 ± 0.0  | 7.9 ± 0.0  | 8.1 ± 0.1  | 7.7 ± 0.0  | 7.9 ± 0.0  | 7.6 ± 0.0  | 7.3 ± 0.0  | 8.2 ± 0.1 | 8.1 ± 0.0 |
| <i>CSLC5</i>   | At4g31590 | 7.0 ± 0.0  | 7.0 ± 0.1  | 6.4 ± 0.0 | 5.8 ± 0.0  | 6.3 ± 0.0  | 5.2 ± 0.0  | 5.6 ± 0.0  | 5.4 ± 0.0  | 4.9 ± 0.4  | 6.1 ± 0.0  | 5.5 ± 0.0 | 6.1 ± 0.1 |
|                | At5g01210 | 6.7 ± 0.0  | 6.4 ± 0.1  | 6.7 ± 0.0 | 8.6 ± 0.0  | 7.9 ± 0.0  | 8.1 ± 0.0  | 8.6 ± 0.0  | 9.0 ± 0.0  | 8.4 ± 0.1  | 7.5 ± 0.0  | 7.4 ± 0.1 | 7.7 ± 0.0 |
| <i>CESA3</i>   | At5g05170 | 10.1 ± 0.2 | 10.1 ± 0.1 | 9.7 ± 0.1 | 10.3 ± 0.0 | 10.2 ± 0.0 | 10.2 ± 0.0 | 9.8 ± 0.0  | 10.1 ± 0.0 | 10.1 ± 0.0 | 9.4 ± 0.0  | 9.1 ± 0.0 | 9.2 ± 0.0 |
|                | At5g07830 | 6.6 ± 0.1  | 6.6 ± 0.0  | 6.3 ± 0.0 | 6.1 ± 0.1  | 6.1 ± 0.0  | 6.1 ± 0.0  | 6.4 ± 0.1  | 6.1 ± 0.0  | 6.7 ± 0.0  | 7.5 ± 0.0  | 6.5 ± 0.1 | 7.0 ± 0.1 |
| <i>TUB6</i>    | At5g12250 | 9.3 ± 0.0  | 8.9 ± 0.0  | 8.7 ± 0.0 | 9.1 ± 0.0  | 9.4 ± 0.0  | 9.1 ± 0.0  | 8.7 ± 0.1  | 8.8 ± 0.0  | 8.9 ± 0.0  | 9.5 ± 0.0  | 8.8 ± 0.0 | 8.5 ± 0.1 |
| <i>TUA3</i>    | At5g19770 | 7.3 ± 0.0  | 7.0 ± 0.0  | 7.1 ± 0.0 | 7.0 ± 0.1  | 7.6 ± 0.1  | 7.0 ± 0.0  | 6.8 ± 0.0  | 7.2 ± 0.0  | 7.3 ± 0.0  | 8.0 ± 0.0  | 7.3 ± 0.0 | 7.1 ± 0.0 |
| <i>DIN10</i>   | At5g20250 | 7.2 ± 0.1  | 6.7 ± 0.0  | 6.0 ± 0.0 | 9.2 ± 0.1  | 8.3 ± 0.0  | 9.5 ± 0.1  | 8.4 ± 0.0  | 9.3 ± 0.0  | 9.8 ± 0.0  | 7.6 ± 0.0  | 9.2 ± 0.0 | 7.1 ± 0.1 |
|                | At5g26665 | 5.8 ± 0.0  | 6.1 ± 0.0  | 5.4 ± 0.1 | 5.3 ± 0.0  | 5.3 ± 0.0  | 5.0 ± 0.0  | 5.4 ± 0.1  | 4.6 ± 0.0  | 4.3 ± 0.0  | 5.8 ± 0.0  | 5.5 ± 0.0 | 5.5 ± 0.1 |
|                | At5g43760 | 7.2 ± 0.0  | 6.4 ± 0.0  | 6.3 ± 0.0 | 7.4 ± 0.0  | 7.4 ± 0.1  | 7.3 ± 0.0  | 6.5 ± 0.0  | 7.0 ± 0.0  | 7.1 ± 0.0  | 6.7 ± 0.0  | 7.2 ± 0.0 | 7.3 ± 0.1 |
| <i>FLA1</i>    | At5g55730 | 7.2 ± 0.0  | 6.9 ± 0.0  | 7.2 ± 0.0 | 7.2 ± 0.0  | 6.8 ± 0.0  | 6.9 ± 0.0  | 7.2 ± 0.0  | 7.2 ± 0.0  | 6.5 ± 0.0  | 7.4 ± 0.0  | 7.0 ± 0.1 | 6.6 ± 0.0 |
| <i>CESA6</i>   | At5g64740 | 8.6 ± 0.0  | 8.5 ± 0.1  | 7.7 ± 0.0 | 8.1 ± 0.0  | 8.4 ± 0.0  | 8.4 ± 0.0  | 7.9 ± 0.1  | 7.8 ± 0.0  | 8.1 ± 0.0  | 8.8 ± 0.0  | 8.5 ± 0.0 | 9.3 ± 0.0 |
| <i>CYCD3.2</i> | At5g67260 | 7.1 ± 0.0  | 7.0 ± 0.0  | 6.9 ± 0.1 | 6.8 ± 0.0  | 7.0 ± 0.0  | 5.7 ± 0.0  | 6.1 ± 0.0  | 6.1 ± 0.0  | 5.4 ± 0.0  | 6.5 ± 0.0  | 7.0 ± 0.0 | 6.6 ± 0.0 |
